# Supplementary material for: Storylines of extreme summer temperatures in southern South America
Source: Copernicus journal article supplement (doi:10.5194/egusphere-2025-3357), 2025-07-29
Supplement: Supplementary file 1 [file egusphere-2025-3357-supplement.pdf]

*Supplement of*

## **Storylines of extreme summer temperatures in southern South America**

Solange Suli et al.

*Correspondence to:* Solange Suli ([ssuli@ucm.es](mailto:ssuli@ucm.es))

| #  | Model name       | Modelling centre                                                                                                                                                 | Member   | Resolution (lon x lat) |
|----|------------------|------------------------------------------------------------------------------------------------------------------------------------------------------------------|----------|------------------------|
| 1  | ACCESS-CM2       | Australian Community Climate and Earth System Simulator (ACCESS), Australia                                                                                      | r1i1p1f1 | 1.9° x 1.3°            |
| 2  | ACCESS-ESM1-5    | Australian Community Climate and Earth System Simulator (ACCESS), Australia                                                                                      | r1i1p1f1 | 1.9° x 1.3°            |
| 3  | BCC-CSM2-MR      | Beijing Climate Center, Beijing, China                                                                                                                           | r1i1p1f1 | 1.1° x 1.1°            |
| 4  | CAMS-CSM1-0      | Chinese Academy of Meteorological Sciences, Beijing, China                                                                                                       | r2i1p1f1 | 1.1° x 1.1°            |
| 5  | CMCC-ESM2        | Fondazione Centro Euro-Mediterraneo sui Cambiamenti Climatici, Italy                                                                                             | r1i1p1f1 | 1.3° x 0.9°            |
| 6  | CNRM-CM6-1       | Centre National de Recherches Météorologiques, France                                                                                                            | r1i1p1f2 | 1.4° x 1.4°            |
| 7  | CNRM-CM6-1-HR    | Centre National de Recherches Météorologiques, France                                                                                                            | r1i1p1f2 | 0.5° x 0.5°            |
| 8  | CNRM-ESM2-1      | Centre National de Recherches Météorologiques, France                                                                                                            | r1i1p1f2 | 1.4° x 1.4°            |
| 9  | EC-Earth3        | Consortium of various institutions from Spain, Italy, Denmark, Finland, Germany, Ireland, Portugal, Netherlands, Norway, the United Kingdom, Belgium, and Sweden | r1i1p1f1 | 0.7° x 0.7°            |
| 10 | EC-Earth3-CC     | Consortium of various institutions from Spain, Italy, Denmark, Finland, Germany, Ireland, Portugal, Netherlands, Norway, the United Kingdom, Belgium, and Sweden | r1i1p1f1 | 0.7° x 0.7°            |
| 11 | EC-Earth3-Veg    | Consortium of various institutions from Spain, Italy, Denmark, Finland, Germany, Ireland, Portugal, Netherlands, Norway, the United Kingdom, Belgium, and Sweden | r1i1p1f1 | 0.7° x 0.7°            |
| 12 | EC-Earth3-Veg-LR | Consortium of various institutions from Spain, Italy, Denmark, Finland, Germany, Ireland, Portugal, Netherlands, Norway, the United Kingdom, Belgium, and Sweden | r1i1p1f1 | 1.1° x 1.1°            |
| 13 | GFDL-CM4         | National Oceanic and Atmospheric Administration, GFDL, Princeton, USA                                                                                            | r1i1p1f1 | 1.3° x 1°              |
| 14 | GFDL-ESM4        | National Oceanic and Atmospheric Administration, GFDL, Princeton, USA                                                                                            | r1i1p1f1 | 1.3° x 1°              |

|    |                 |                                                                                                           |          |             |
|----|-----------------|-----------------------------------------------------------------------------------------------------------|----------|-------------|
| 15 | GISS-E2-1-G     | Goddard Institute for Space Studies, United States                                                        | rlilplf2 | 2.5° x 2°   |
| 16 | HADGEM3-GC31-LL | Met Office Hadley Centre (UKMO), United Kingdom                                                           | rlilplf3 | 1.9° x 1.3° |
| 17 | HADGEM3-GC31-MM | Met Office Hadley Centre (UKMO), United Kingdom                                                           | rlilplf3 | 0.8 x 0.6   |
| 18 | INM-CM4-8       | Institute for Numerical Mathematics, Russian Academy of Science, Moscow, Russia                           | rlilplf1 | 2° x 1.5°   |
| 19 | INM-CM5-0       | Institute for Numerical Mathematics, Russian Academy of Science, Moscow, Russia                           | rlilplf1 | 2° x 1.5°   |
| 20 | IPSL-CM6A-LR    | Institut Pierre Simon Laplace, Paris, France                                                              | rlilplf1 | 2.5° x 1.3° |
| 21 | KACE-1-0-G      | National Institute of Meteorological Sciences/Korea Meteorological Administration (NIMS-KMA), South Korea | rlilplf1 | 1.9° x 1.3° |
| 22 | MPI-ESM1-2-HR   | Max Planck Institute for Meteorology, Germany                                                             | rlilplf1 | 0.9° x 0.9° |
| 23 | MPI-ESM1-2-LR   | Max Planck Institute for Meteorology, Germany                                                             | rlilplf1 | 1.9° x 1.9° |
| 24 | MRI-ESM2-0      | Meteorological Research Institute, Tsukuba, Japan                                                         | rlilplf1 | 1.1° x 1.1° |
| 25 | TAIESM1         | Research Center for Environmental Changes, Academia Sinica, Taiwan                                        | rlilplf1 | 1.3° x 0.9° |
| 26 | UKESM1-0-LL     | Met Office Hadley Centre (UKMO), Devon, United Kingdom                                                    | rlilplf2 | 1.9° x 1.3° |

**Table S1. List of CMIP6 models used in the study.**

| Region | $\Delta TXx$                  | $\Delta TX90$    | $\Delta HWD$     | $\Delta HWE$                  | $\Delta HWI$     |
|--------|-------------------------------|------------------|------------------|-------------------------------|------------------|
| NS     | $\Delta N3.4, \Delta SACZ$    | -                | -                | -                             | -                |
| CES    | $\Delta SACZ$                 | -                | -                | $\Delta SACZ$                 | -                |
| CA     | $\Delta SM_{CA}, \Delta SACZ$ | $\Delta SM_{CA}$ | $\Delta SM_{CA}$ | $\Delta SM_{CA}, \Delta SACZ$ | -                |
| SS     | $\Delta SM_{SS}, \Delta Z500$ | $\Delta Z500$    | $\Delta Z500$    | $\Delta SACZ$                 | $\Delta SM_{SS}$ |

**Table S2. Statistically significant drivers (p-value < 0.1) for each HW index (columns:  $\Delta TXx$ ,  $\Delta TX90$ ,  $\Delta HWD$  duration,  $\Delta HWE$  extension and  $\Delta HWI$  intensity) and SSA region (rows: NS, CES, CA and SS). HW attributes were extracted from the algorithm developed by Sánchez-Benítez et al. (2020). The dash ('-') indicates that none of the drivers showed a statistically significant relationship with the corresponding index.**
